# Supplementary material
Source: PubMed Central journal article supplement (PMC7048268)
Supplement: MCB.00492-19-s0002.pdf [file MCB.00492-19-s0002.pdf]

## Supplementary Table S1. Primers used in this study

|                   |                                                      |
|-------------------|------------------------------------------------------|
| F-ATG16L1-T7-5'   | CCAAGCTTCTAATACGACTCACTATAGGGAGATTCCGGCCCTCTCGAAAAT  |
| R-ATG16L1-5'      | GACATGTCACCTTGCTGCC                                  |
| F-ATG16L1-T7-CR   | CCAAGCTTCTAATACGACTCACTATAGGGAGAACAGGCACGAGATAAGTCCC |
| R-ATG16L1-CR      | GCCCATGTGCTTCTTCTGAG                                 |
| F-ATG16L1-T7-3'   | CCAAGCTTCTAATACGACTCACTATAGGGAGACTCATCCATCAATGCGGTGG |
| R-ATG16L1-3'      | GTGATCAGGCAGGGAAGAGA                                 |
| pmiR-F-ATG16L1-5' | GATATCTTCCGGCCCTCTCGAAAAT                            |
| pmiR-R-ATG16L1-5' | GAATCCGGCCCTCTCGAAAAT                                |
| pmiR-F-ATG16L1-CR | GAGCTACAGGCACGAGATAAGTCCC                            |
| pmiR-R-ATG16L1-CR | TCTAGCCCATGTGCTTCTTCTGAG                             |
| pmiR-F-ATG16L1-3' | GAGCTCTCATCCATCAATGCGGTGG                            |
| pmiR-R-ATG16L1-3' | TCTAGTGATCAGGCAGGGAAGAGA                             |
| F-circPABPN1      | GGACCACCAACTACAACAGC                                 |
| R-circPABPN1      | TTGGGATCACCTGTAGACGC                                 |
